# Supplementary material for: Biogenically driven marine organic aerosol production over the Northwest Pacific Ocean
Source: Copernicus journal article supplement (doi:10.5194/egusphere-2025-3951), 2025-08-28
Supplement: Supplementary file 1 [file egusphere-2025-3951-supplement.pdf]

## Supplementary Information

### **Biogenically driven marine organic aerosol production over the Northwest Pacific Ocean**

5 Yujue Wang<sup>1, 2, \*</sup>, Yizhe Yi<sup>1</sup>, Wei Xu<sup>3, \*</sup>, Yiwen Zhang<sup>1</sup>, Shubin Li<sup>1</sup>, Hong-Hai Zhang<sup>4</sup>, Mingliang Gu<sup>1</sup>,  
Shibo Yan<sup>5</sup>, Jialei Zhu<sup>6</sup>, Chao Zhang<sup>1, 2</sup>, Jinhui Shi<sup>1, 2</sup>, Yang Gao<sup>1, 2</sup>, Xiaohong Yao<sup>1, 2</sup>, Huiwang Gao<sup>1, 2</sup>

<sup>1</sup>Frontiers Science Center for Deep Ocean Multispheres and Earth System, Key Laboratory of Marine Environment and Ecology, Ministry of Education of China, Ocean University of China, Qingdao, China

10 <sup>2</sup>Laboratory for Marine Ecology and Environmental Science, Qingdao Marine Science and Technology Center, Qingdao, China

<sup>3</sup>State Key Laboratory of Advanced Environmental Technology, Institute of Urban Environment, Chinese Academy of Sciences, Xiamen, China

<sup>4</sup>Key Laboratory of Marine Chemistry Theory and Technology, Ministry of Education, Ocean University of China, Qingdao 266100, China

15 <sup>5</sup>Third Institute of Oceanograph, Ministry of Natural Resources, Siming District, Xiamen, Fujian 361005, China

<sup>6</sup>Institute of Surface-Earth System Science, School of Earth System Science, Tianjin University, Tianjin, China

\* Correspondence to: Yujue Wang ([wangyujue@ouc.edu.cn](mailto:wangyujue@ouc.edu.cn)); Wei Xu ([wxu@iue.ac.cn](mailto:wxu@iue.ac.cn))

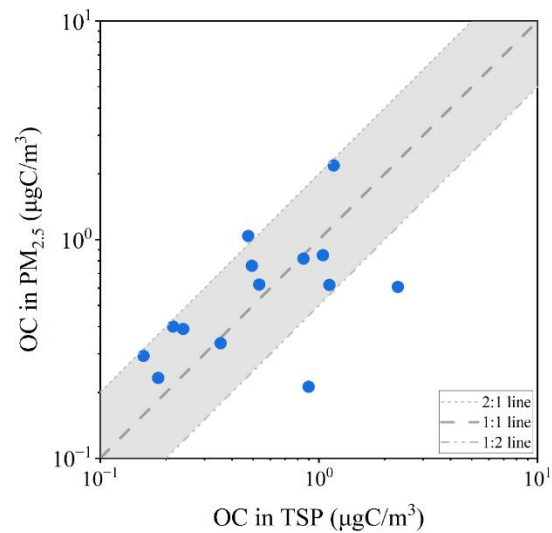

25 **Figure S1** Comparison of the OC concentrations in the PM<sub>2.5</sub> samples and the TSP samples during the spring observation (Cruise I)

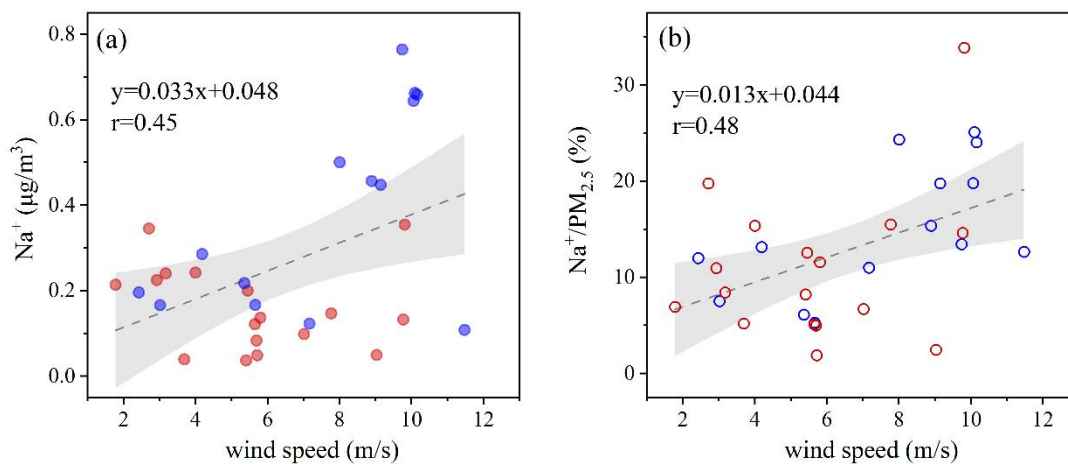

**Figure S2** The variation of Na<sup>+</sup> concentration and Na<sup>+</sup>/PM<sub>2.5</sub> as a function of the wind speed during the cruises.

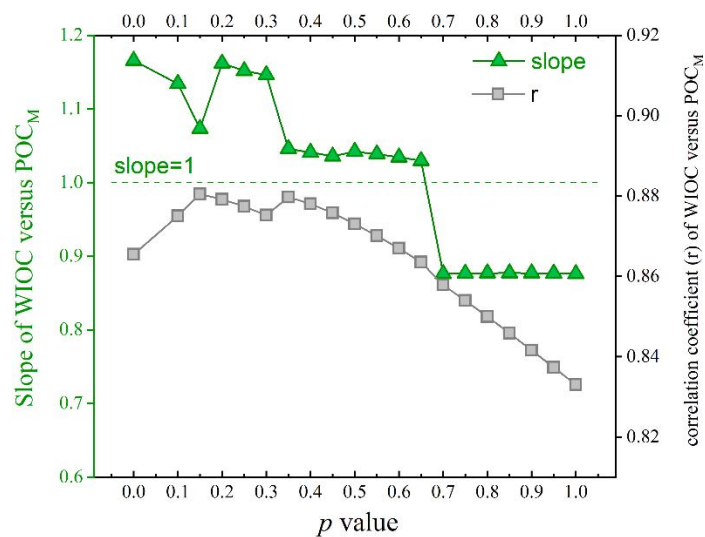

30

**Figure S3** The variations of the fitting line slopes and correlation coefficients ( $r$ ) of WIOC and estimated  $POC_M$ , using Eq. 3 with the  $p$  value changing from 0–1.

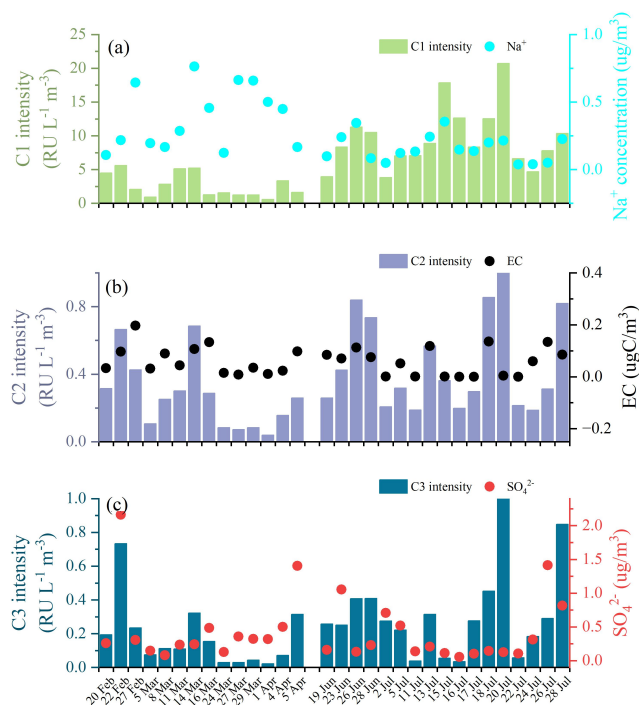

**Figure S4** Variations of fluorescence component intensity identified by three-component solutions based on PARAFAC model analysis and related aerosol components: (a) C1 and  $Na^+$ , (b) C2 and EC, (c) C3 and  $SO_4^{2-}$ .

35
